# Supplementary material for: Citizens’ Juries: When Older Adults Deliberate on the Benefits and Risks of Smart Health and Smart Homes
Source: MDPI journal article supplement (doi:10.3390/healthcare7020054), 2019-04-01
Supplement: s1 [file s1]

## Citizen's Jury Pre-session Survey

**1. How often do you use technology such as the following; mobile phone, motion sensors or alert systems?**

- a) Several times a day
- b) Sometimes
- c) Rarely
- d) Never

**2. How does "Smart City Nottingham" make you feel?**

- a) Interested about future opportunities
- b) Not interested
- c) Concerned about technology

**3. Do you think that it's important for older people to use new technologies?**

- a) Yes, really important
- b) Quite important
- c) Not really important
- d) Don't know

**4. Would you like to be able to influence the design of such technologies?**

- a) I do not see the point, nobody will listen to me
- b) Yes, but I do not know how
- c) Definitely, we should be able to shape or future of assistive technologies

**5. Who should design and implement the health applications for well-being?**

- a) Technology developers
- b) Technology consumers
- c) Local government
- d) A representative mix of all the above

**6. Do you think that Smart Cities have...**

- a) too much influence over the future healthcare for older adults
- b) the right amount of influence over the future healthcare for older adults
- c) a little influence over the future healthcare for older adults
- d) no influence at all over the future healthcare for older adults

**7. Have you ever think about the ethical consequences of health technologies?**

- a) Yes – often
- b) Yes – sometimes
- c) Yes - A little
- d) No

**8. Do you think you can influence the way the health technology industry is advancing?**

- a) Yes, a lot
- b) Yes, sometimes
- c) Yes, a little
- d) No

**9. Do you think that you should have more influence in how Smart Cities are advancing?**

- a) Yes
- b) No
- c) Maybe
- d) Don't know

## Citizens' Jury Post-session Survey

### 1. Who should be accountable if smart technologies go wrong?

- a) The manufacturer
- b) The commissioners
- c) The health services
- d) Other
- e) Don't know

### 2. Did you learn anything new today about assistive technologies for health promotion and self-care?

- a) Yes, a lot
- b) Yes, a little
- c) No
- d) Don't know

### 3. Did you come up with any new ideas today about how we could make Smart Cities more accessible to older adults?

- a) Yes, lots of them
- b) Yes, a few
- c) No
- d) Don't know

**4. On a scale of 1 to 10 (with 1 meaning very little and 10 meaning very much), how much do you agree with the following statements:**

- 1) Smart Cities promote inequalities among citizens that do not have access to technology
- 2) Replacing human with technology is a good idea
- 3) The benefits of health technology for society exceed the risks
- 4) Smart City initiatives have the potential to reach to more people
- 5) I want to know more about the impact that Smart Cities can have on people
- 6) I will try to use health technologies more often
- 7) Smart Cities bring more opportunities to its older citizens
- 8) The ethical consequences of health technologies are minimal
- 9) Smart Cities should not influence the future healthcare for older adults
- 10) I would like to be have a say on the way Smart Cities are advancing

**5. On a scale of 1 to 10 (with 1 meaning very little and 10 meaning very much), how much do the following statements apply to you:**

- 1) I'm confident that I can influence societal opinion regarding the implementation of health technologies within Smart Cities
- 2) Nobody is going to listen to what older adults say about Smart Cities
- 3) I've changed my mind today about smart solutions for improving health and well-being of older people
- 4) When I think about the social implications that can be expected from health technologies, I feel more confident about my own opinion
- 5) I would like to influence decision making and relevant policy regarding the implementation of health technologies among older adults
